# Supplementary material for: Temperature Dependent Synthesis of NiCo₂O₄ Nanostructures and Their Supercapacitor Performance: Morphological Transitions from Spherical to Flower-Like Structures
Source: Research Square preprint supplement (doi:10.21203/rs.3.rs-8333957/v1), 2025-12-15
Supplement: Supplementary file 1 [file 6e2d43515a3e20e79aababaf.docx]

| **Citation** | **Year** | **Material**  **Composition** | **Morphology**  **nanostructure** | **Synthesis method** | **Electrode configuration** | **Electrochemical**  **techniques** | **Cycles** | **Efficiency** |
| --- | --- | --- | --- | --- | --- | --- | --- | --- |
| https://doi.org/10.1016/S0013-4686(01)00496-0 | 2001 | PEO–KOH–H2O | _ | casting technique | polymer  electrolyte and activated carbon Powder | CV & GCD | _ | 93 F g−1  90 F g−1 |
| https://doi.org/10.1016/S0013-4686(02)00031-2 | 2002 | Mn3O4 | _ | electrochemically | PT foil and with an Ag/ AgNO3/ TBAClO4/ | CV & GCD | _ | 50 to 144 F g1 a |
| https://doi.org/10.1016/S0378-7753(02)00647-X | 2003 | MnOxnH2O | _ |  | Ag/AgCl , SHE,  platinum gauze | CV & GCD | _ | 220 F g1 |
| 10.1016/j.elecom  .2004.03.011 | 2004 | MnO2 _ nH2O | cross-linked and needle- | sol–gel | graphite electrode | CV & GCD | 1000 | 45 mF/cm2 |
| 10.1149/1.  2041147 | 2005 | ruthenium oxide , Pt plate and carbon paper substrate. | threedimensional  nanoporous structure. | potential cycling  method | ruthenium oxide,  counter,  reference,  electrode | CV & GCD |  | 1170 F/g |
| https://doi.org/10.1016/j.jpowsour.2005.05.051 | 2006 | Polyaniline&Nickel | spongy and highly porous | deposited potentiodynamically | 1. Ag/AgCl 2. Nickel 3. platinum foil | CV,GCD,EIS | 50 | ∼4.05 × 102 F g− |
| https://doi.org/10.1016/j.jpowsour.2006.09.060 | 2007 | RuO2·xH2O/Ti substrate/RuCl3·xH2O | “mud-cracked” | anodic deposition of RuO2·xH2O onto Ti |  | EIS&CV&LSV |  | 460 - 552 F g− |
| https://doi.org/10.1016/j.electacta.2008.04.028 | 2008 | MnO2/PPy& graphite | highly porous | electrochemical co-deposition | s MnO2 and MnO2/PPy nanocomposite | CV & | 5000  1000 | 120 F g−1  180 F g−1 |
| https://doi.org/10.1016/j.jpowsour.2008.10.080 | 2009 | manganese oxide  potassium &  permanganate(VII) &  manganese(II) sal | spherical grains | precipitation method | manganese oxide &  carbon black/graphite fibres | CV and galvanostatic CD |  | 267 F g−1 |
| https://doi.org/10.1021/nn90131t | 2010 | (GOMnO2 | needle-like | a simple soft chemical route in a waterisopropyl alcohol system. | Platinum foil &  (SCE) &  Hg/HgO | CV & galvanostatic CD |  |  |
| 10.1149/1.3574021 | 2011 | (Ni-Co) | porous | sol-gel | 1. platinum plate 2. SCE | CV  GCD | 2000 | 1539, 1447 and 1136 F g1 |
| https://doi.org/10.1039/C2JM30927K | 2012 | Co(NO3)2 + Ni(NO3)2+ NH4NO3 | Flower like | simple electrochemical method | F-doped SnO  graphite rod  SCE | CV  GCD |  | f 89.2 F g1 |
| https://doi.org/10.1039/C3EE41143E | 2013 | 8 Ni(NO3)2·6H2O and Co(NO3)2·6H2O | nanodiscs | a co-precipitation | saturated calomel & platinum | CV  GCD  EIS | 5000 | 2360 F/g |
| https://doi.org/10.1016/j.jpowsour.2014.07.164 | 2014 | Ni–Co–Sn | revealed cracks | Pechini | ECs electrodes | [cyclic voltammetry](https://www.sciencedirect.com/topics/materials-science/cyclic-voltammetry)   CV | 600 | 328 F g−1. |
| https://doi.org/10.1016/j.electacta.2015.02.095 | 2015 | NixCo(1−x)(OH)2 | flower-like | template-free | Pt foil and Hg/HgO | Cv  gs | 4000 |  |
| https://pubs.acs.org/doi/abs/10.1021/acsami.6b05933 | 2016 | Co3O4–MnO2–NiO | nanostructure | facile | Ag/AgCl, and Pt electrodes | Cyclic voltammetry,  Galvanostatic | 5700 | 2525 F/g |
| https://pubs.acs.org/doi/abs/10.1021/acssuschemeng.7b01860 | 2017 | ASCs  (NCO-NS and NCO-NW | nanosheets ,nanowires |  | Ag/AgCl, and Pt electrodes | 3-electrode cell | 2000 | 91.12% |
| https://doi.org/10.1016/j.ceramint.2018.08.292 | 2018 | 3DG/NixCo1-xO |  | one-step | Pt foil as the counter electrode and Hg/HgO as the reference electrode. | CV),& galvanostatic discharge-charge (GCD) | 10,000 | 697.8 F g−1 |
| https://doi.org/10  1039/C8NR08077A | 2019 | Nickel Cobalt oxide | 3D flower-like | facile hydrothermal method | Ag/AgCl &pt | CV &  GSD | 5000 | (~203.81 F.g-1 |
| https://doi.org/10.1016/j.cej.2019.123357 | 2020 | Zn-Ni-Co oxide | transparent foldable silk-like | hydrothermal process combined with post-annealing methods | Ag/AgCl and Pt foil | EIS,  Cv&  GCD | 10,000 |  |
| https://doi.org/10.1016/j.surfcoat.2021.126933 | 2021 | NiCo2O4 and NiCo2S4 | dandelion shape | facile [hydrothermal method](https://www.sciencedirect.com/topics/materials-science/hydrothermal-synthesis). |  | Cv&  GCD | , 5000 | 3.65 F/cm2 |
| https://doi.org/10.1080/21  663831.2022.2077149 | 2022 | NiCo LDH, mesoporous and  macroporous | sheet-like | Hydrothermal, low-temperature phosphating  treatment | phosphorus and selenium  facilitate | CV & GCD |  |  |
| https://doi.org/10.1007/s42452-023-05341-8 | 2023 | NiCo2O4 | 2D nanosheet  structure | hydrothermal | (Pt) wire and Ag/AgCl | CV & GCD, EIS |  |  |
| https://doi.org/10.1007/s10854-024-13223-x | 2024 | NCP | microplatelike  and nanoflakes | polyol-based reflux | Platinum  wire (Pt) and Ag/AgCl | CV & GCD, EIS | 10,000 | 144.66 Fg−  1 |
